# Supplementary material for: Nuclear Egress Complexes of HCMV and Other Herpesviruses: Solving the Puzzle of Sequence Coevolution, Conserved Structures and Subfamily-Spanning Binding Properties
Source: MDPI journal article supplement (doi:10.3390/v12060683), 2020-06-24
Supplement: s1 [file s1]

# Supplementary Materials

Review

## Nuclear egress complexes of HCMV and other herpesviruses: solving the puzzle of sequence coevolution, conserved structures and subfamily-spanning binding properties

Manfred Marschall <sup>1,\*</sup>, Sigrun Häge <sup>1,&</sup>, Marcus Conrad <sup>2,&</sup>, Sewar Alkhashrom <sup>3,&</sup>, Jintawee Kicuntod <sup>1</sup>, Johannes Schweininger <sup>4</sup>, Mark Kriegel <sup>4</sup>, Josephine Lösing <sup>1</sup>, Julia Tillmanns <sup>1</sup>, Frank Neipel <sup>1</sup>, Jutta Eichler <sup>3</sup>, Yves A. Muller <sup>4</sup>, Heinrich Sticht <sup>2</sup>

<sup>1</sup> Institute for Clinical and Molecular Virology, Friedrich-Alexander University of Erlangen-Nürnberg, Medical Center, Erlangen, Germany; manfred.marschall@fau.de.

<sup>2</sup> Division of Bioinformatics, Institute of Biochemistry, Friedrich-Alexander University of Erlangen-Nürnberg, 91054 Erlangen, Germany; heinrich.sticht@fau.de.

<sup>3</sup> Department of Chemistry and Pharmacy, Division of Medicinal Chemistry, Friedrich-Alexander University of Erlangen-Nürnberg, Erlangen, Germany; jutta.eichler@fau.de.

<sup>4</sup> Department of Biology, Division of Biotechnology, Friedrich-Alexander University of Erlangen-Nürnberg (FAU), Erlangen, Germany; yves.muller@fau.de.

& These authors contributed equally to the study.

\* Correspondence: manfred.marschall@fau.de; Tel.: +49 9131 85-26089.

**Table S1.** Sequences of HCMV pUL53 and EBV BFLF2 hook peptides.

| Peptide            | Sequence (position numbers are based on pUL53 and BFLF2, respectively)                                                                 |
|--------------------|----------------------------------------------------------------------------------------------------------------------------------------|
| pUL53 hook peptide | Ac <sup>a</sup> - <sup>59</sup> LTLDLHDIFREHPELELKYLNNMMKMAIT <sup>87</sup> -Aoa <sup>b</sup> -Lys(Fluo <sup>c</sup> )-NH <sub>2</sub> |
| BFLF2 hook peptide | Ac- <sup>78</sup> DRSHFSLRDFFRGISANFELGKDFLREMNTPIH <sup>110</sup> -Aoa-Lys(Fluo)-NH <sub>2</sub>                                      |

<sup>a</sup> Ac, acetyl; <sup>b</sup> Aoa, 8-amino-3,6-dioxaoctanoic acid; <sup>c</sup> Fluo, fluorescein

**Figure S1.** Video depiction of herpesviral 3D core NEC crystal structures: (a) HSV-1, (b) PRV, (c) HCMV and (d) EBV.

(a)

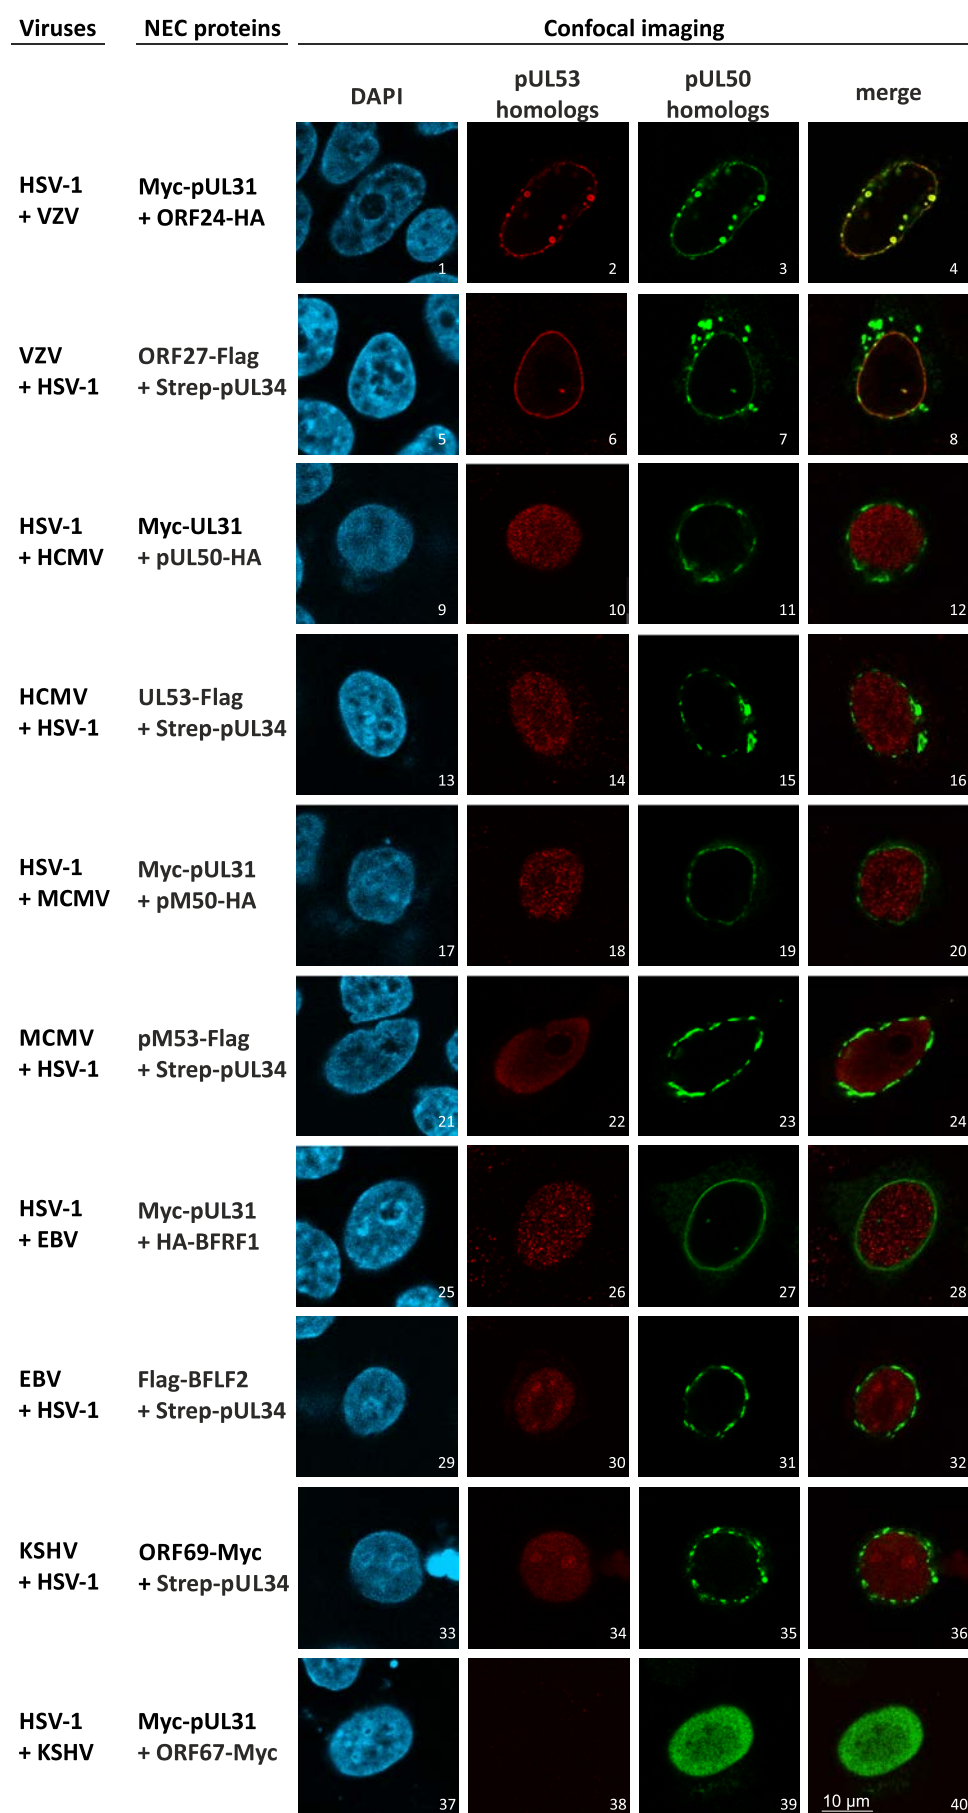

(b)

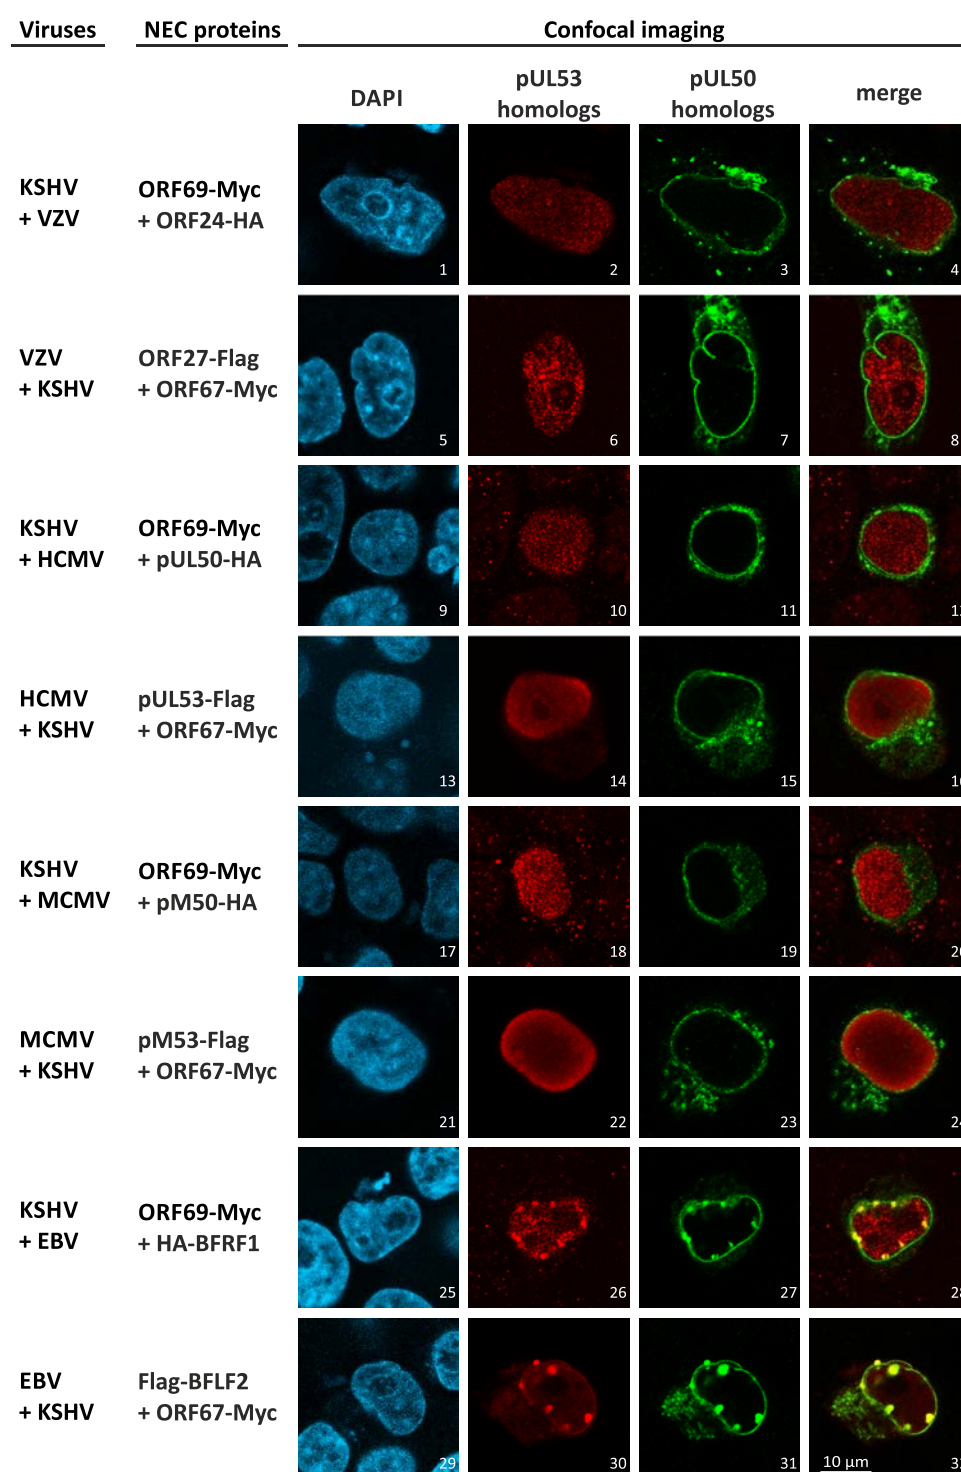

**Figure S2.** Primary data of confocal imaging analysis comparing autologous versus nonautologous  $\alpha$ -/ $\beta$ -/ $\gamma$ -herpesviral core NEC interactions. HeLa cells were transiently transfected with constructs coding for tagged versions of the NEC proteins indicated. Cells were fixed and used for indirect immunostaining with tag-specific primary and fluorescence-labeled secondary antibodies. **(a)** Combinations between HSV-1-specific and various herpesviral NEC proteins. **(b)** Combinations between KSHV-specific and various herpesviral NEC proteins. Scale bar 10  $\mu$ m.

## Materials and Methods

The detailed mechanistic and structural analyses of herpesviral nuclear egress proteins, which have been performed by a great number of independent research groups, are reviewed in Marschall et al. [8]. Materials and Methods used for  $\alpha$ -,  $\beta$ - and  $\gamma$ -herpesviruses are specifically referenced therein. For the sequence alignments, the crystal structures of the three subfamily prototypical NEC complexes from HSV-1 (PDB entry code: 4ZXS), HCMV (6T3X), and EBV (6T3Z) were structurally superimposed first and a structure-based sequence alignment deduced. Subsequently, subfamily-specific multiple sequence alignments were calculated and merged with the structure-based sequence alignment. Concerning the generation of primary data sets included in this review article, the Materials and Methods used were published previously [9-12,21-23,25-28]. Peptide synthesis methods [29], as well as the competitive pUL50-pUL53 binding assay to assess the inhibitory activity of the alanine and D-amino acid scan pUL53 hook peptides were previously described [22]. For the fluorescence polarization assay, C-terminally fluoresceinylated pUL53 and BFLF2 hook peptides (25 nM) were incubated with bacterially produced, recombinant pUL50 and BFRF1, respectively, at two-fold serial dilutions, starting at 10  $\mu$ M (BFRF1) and 20  $\mu$ M (pUL50), respectively. Fluorescence polarization was measured at 485 nm (excitation) and 535 nm (emission).
